# Supplementary material
Source: publisher figshare collection journal article supplement (https://tandf.figshare.com/ndownloader/files/13152296)
Supplement: Supplementary file 1 [file 13152296]

Supplementary Fig.1 Representative HPLC chromatogram of the phenolic extracts from seed coat (A) and cotyledon (B) of FD18 at stage S2. The peaks are (1) protocatechuic acid, (2) *p*-hydroxybenzoic acid, (3) catechin, (4) caffeic acid, (5) epicatechin, (6) *p*-coumaric acid, (7) ferulic acid and (8) quercetin.

3

A

1

2

4

5

6

7

8

B

3

7

8

5

Fig.1 Representative HPLC chromatogram of the phenolic extract from seed coat (A) and cotyledon (B) of FD18 at stage S2. The peaks are (1) protocatechuic acid, (2) *p*-hydroxybenzoic acid, (3) catechin, (4) caffeic acid, (5) epicatechin, (6) *p*-coumaric acid, (7) ferulic acid and (8) quercetin.
